# Supplementary material
Source: PubMed Central journal article supplement (PMC8762983)
Supplement: 40620_2021_1235_MOESM1_ESM.pdf [file 40620_2021_1235_MOESM1_ESM.pdf]

# Online Resource 1

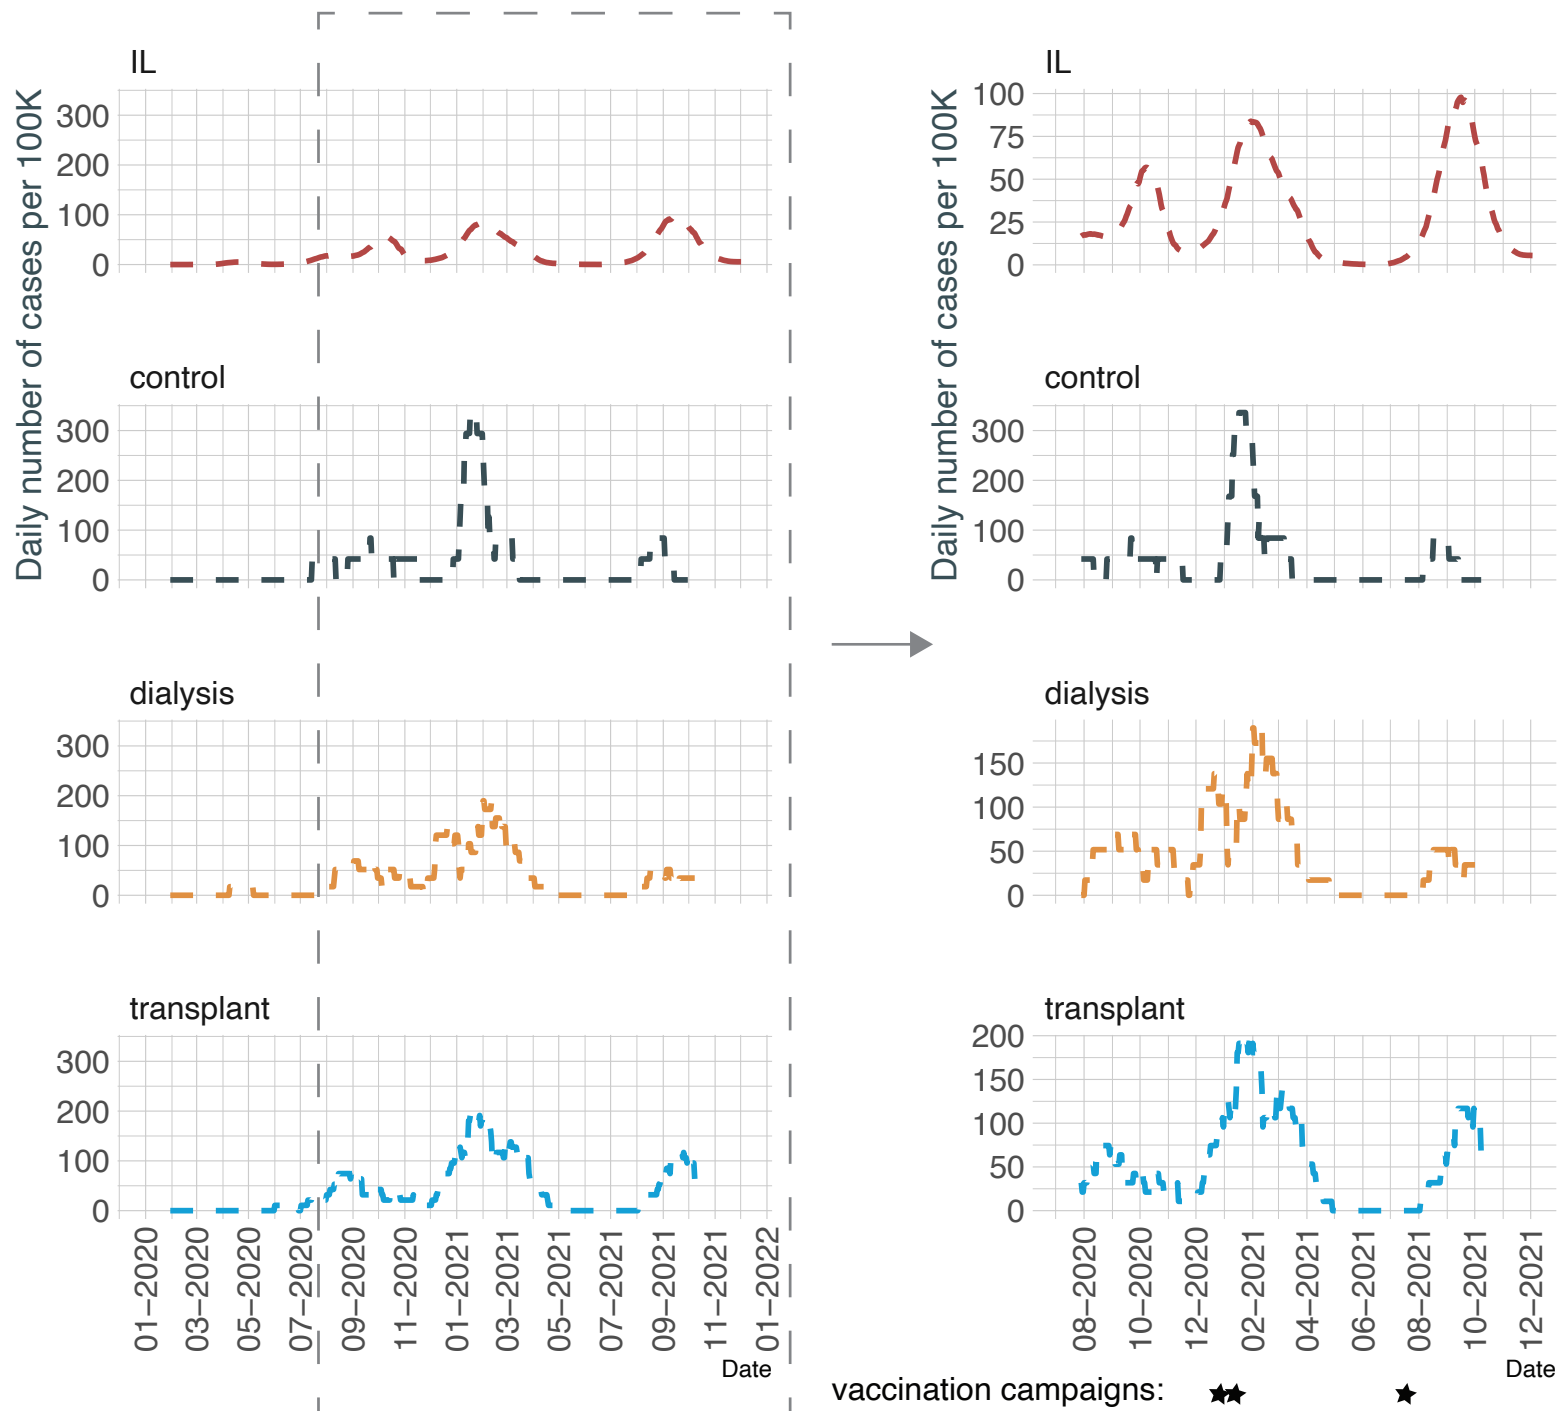

**Figure:** Daily number of COVID-19 cases per 100,000 population in Israel (top panel) and in our study groups (bottom panels). Population data was downloaded from the World Health Organization [WHO Coronavirus (COVID-19) Dashboard. Accessed 06-Dec-2021, <https://covid19.who.int/WHO-COVID-19-global-data.csv>]. The right-sided panels display zoom-in plots with individualized y-axis scales. Four-week moving averages were plotted using the ggplot2 and tidyquant R/Bioconductor packages.
